# Supplementary material for: Epidemiology of obesity and overweight in sub-Saharan Africa: a protocol for a systematic review and meta-analysis
Source: PubMed Central journal article supplement — BMJ Open. 2017 Nov 25;7(11):e017666. doi: 10.1136/bmjopen-2017-017666 (PMC5719333; doi:10.1136/bmjopen-2017-017666), 2017-11-25
Supplement: bmjopen-2017-017666supp001.pdf [file bmjopen-2017-017666supp001.pdf]

## Appendix 1

### Search strategy

Database(s): **Embase** 1947 to present

| Search | Query                                                                                                                                                                                                                                                                                                                                                                                                                                                                                                                                                                                                                                                                                                                                                                                                                              |
|--------|------------------------------------------------------------------------------------------------------------------------------------------------------------------------------------------------------------------------------------------------------------------------------------------------------------------------------------------------------------------------------------------------------------------------------------------------------------------------------------------------------------------------------------------------------------------------------------------------------------------------------------------------------------------------------------------------------------------------------------------------------------------------------------------------------------------------------------|
| 1      | child*.mp.                                                                                                                                                                                                                                                                                                                                                                                                                                                                                                                                                                                                                                                                                                                                                                                                                         |
| 2      | adolescence/ or middle aged/                                                                                                                                                                                                                                                                                                                                                                                                                                                                                                                                                                                                                                                                                                                                                                                                       |
| 3      | young adult/                                                                                                                                                                                                                                                                                                                                                                                                                                                                                                                                                                                                                                                                                                                                                                                                                       |
| 4      | adult/                                                                                                                                                                                                                                                                                                                                                                                                                                                                                                                                                                                                                                                                                                                                                                                                                             |
| 5      | 1 or 2 or 3 or 4                                                                                                                                                                                                                                                                                                                                                                                                                                                                                                                                                                                                                                                                                                                                                                                                                   |
| 6      | obesity/                                                                                                                                                                                                                                                                                                                                                                                                                                                                                                                                                                                                                                                                                                                                                                                                                           |
| 7      | Overweight.mp.                                                                                                                                                                                                                                                                                                                                                                                                                                                                                                                                                                                                                                                                                                                                                                                                                     |
| 8      | body mass index                                                                                                                                                                                                                                                                                                                                                                                                                                                                                                                                                                                                                                                                                                                                                                                                                    |
| 9      | body fat                                                                                                                                                                                                                                                                                                                                                                                                                                                                                                                                                                                                                                                                                                                                                                                                                           |
| 10     | adiposity                                                                                                                                                                                                                                                                                                                                                                                                                                                                                                                                                                                                                                                                                                                                                                                                                          |
| 11     | Obese/                                                                                                                                                                                                                                                                                                                                                                                                                                                                                                                                                                                                                                                                                                                                                                                                                             |
| 12     | body composition                                                                                                                                                                                                                                                                                                                                                                                                                                                                                                                                                                                                                                                                                                                                                                                                                   |
| 13     | body weight                                                                                                                                                                                                                                                                                                                                                                                                                                                                                                                                                                                                                                                                                                                                                                                                                        |
| 14     | percent body fat                                                                                                                                                                                                                                                                                                                                                                                                                                                                                                                                                                                                                                                                                                                                                                                                                   |
| 15     | body fat distribution                                                                                                                                                                                                                                                                                                                                                                                                                                                                                                                                                                                                                                                                                                                                                                                                              |
| 16     | 6 or 7 or 8 or 9 or 10 or 11 or 12 or 13 or 14 or 15                                                                                                                                                                                                                                                                                                                                                                                                                                                                                                                                                                                                                                                                                                                                                                               |
| 17     | prevalence/                                                                                                                                                                                                                                                                                                                                                                                                                                                                                                                                                                                                                                                                                                                                                                                                                        |
| 18     | "africa south of the sahara"/ OR "angola" [tiab] OR " benin" [tiab] OR " botswana " [tiab] OR " burkina faso" [tiab] OR " burundi" [tiab] OR "ivory coast"[tiab] OR Cameroon [tiab] OR Central African Republic[tiab] OR Chad[tiab] OR Congo[tiab] OR Democratic Republic of the Congo[tiab] OR Equatorial Guinea[tiab] OR Gabon[tiab] OR Burundi[tiab] OR Djibouti[tiab] OR Eritrea[tiab] OR Ethiopia[tiab] OR Kenya[tiab] OR Rwanda[tiab] OR Somalia[tiab] OR Sudan[tiab] OR Tanzania[tiab] OR Uganda[tiab] OR Angola[tiab] OR Botswana[tiab] OR Lesotho[tiab] OR Malawi[tiab] OR Mozambique[tiab] OR Namibia[tiab] OR South Africa[tiab] OR Swaziland[tiab] OR Zambia[tiab] OR Zimbabwe[tiab] OR Benin[tiab] OR Burkina Faso[tiab] OR Cape Verde[tiab] OR Cote d'Ivoire[tiab] OR Gambia[tiab] OR Ghana[tiab] OR Guinea[tiab] OR |

|    |                                                                                                                                                                                                           |
|----|-----------------------------------------------------------------------------------------------------------------------------------------------------------------------------------------------------------|
|    | Guinea-Bissau[tiab] OR Liberia[tiab] OR Mali[tiab] OR Mauritania[tiab]<br>OR Niger[tiab] OR Nigeria[tiab] OR Senegal[tiab] OR Sierra Leone[tiab] OR Togo[tiab]<br>OR (subsaharan[ tiab] AND Africa[tiab]) |
| 19 | 5 and 16 and 17 and 18                                                                                                                                                                                    |

Database(s): **Medline** 1946 - present

Search Strategy:

| Search | Query                                                                                                                                                                                                                                                                                                                                                                                                                                                                                                                                                                               |
|--------|-------------------------------------------------------------------------------------------------------------------------------------------------------------------------------------------------------------------------------------------------------------------------------------------------------------------------------------------------------------------------------------------------------------------------------------------------------------------------------------------------------------------------------------------------------------------------------------|
| 1      | child*.mp.                                                                                                                                                                                                                                                                                                                                                                                                                                                                                                                                                                          |
| 2      | adolescent/ or middle aged/                                                                                                                                                                                                                                                                                                                                                                                                                                                                                                                                                         |
| 3      | young adult/                                                                                                                                                                                                                                                                                                                                                                                                                                                                                                                                                                        |
| 4      | adult/                                                                                                                                                                                                                                                                                                                                                                                                                                                                                                                                                                              |
| 5      | 1 or 2 or 3 or 4                                                                                                                                                                                                                                                                                                                                                                                                                                                                                                                                                                    |
| 6      | Obesity/                                                                                                                                                                                                                                                                                                                                                                                                                                                                                                                                                                            |
| 7      | Overweight/                                                                                                                                                                                                                                                                                                                                                                                                                                                                                                                                                                         |
| 8      | body mass index                                                                                                                                                                                                                                                                                                                                                                                                                                                                                                                                                                     |
| 9      | body fat                                                                                                                                                                                                                                                                                                                                                                                                                                                                                                                                                                            |
| 10     | adiposity                                                                                                                                                                                                                                                                                                                                                                                                                                                                                                                                                                           |
| 11     | Obese/                                                                                                                                                                                                                                                                                                                                                                                                                                                                                                                                                                              |
| 12     | body composition                                                                                                                                                                                                                                                                                                                                                                                                                                                                                                                                                                    |
| 13     | body weight                                                                                                                                                                                                                                                                                                                                                                                                                                                                                                                                                                         |
| 14     | percent body fat                                                                                                                                                                                                                                                                                                                                                                                                                                                                                                                                                                    |
| 15     | body fat distribution                                                                                                                                                                                                                                                                                                                                                                                                                                                                                                                                                               |
| 16     | 6 or 7 or 8 or 9 or 10 or 11 or 12 or 13 or 14 or 15                                                                                                                                                                                                                                                                                                                                                                                                                                                                                                                                |
| 17     | Prevalence/                                                                                                                                                                                                                                                                                                                                                                                                                                                                                                                                                                         |
| 18     | "africa south of the sahara"/ OR "angola" [tiab] OR " benin" [tiab] OR " botswana " [tiab] OR " burkina faso" [tiab] OR " burundi" [tiab] OR "ivory coast"[tiab] OR Cameroon [tiab] OR Central African Republic[tiab] OR Chad[tiab] OR Congo[tiab] OR Democratic Republic of the Congo[tiab] OR Equatorial Guinea[tiab] OR Gabon[tiab] OR Burundi[tiab] OR Djibouti[tiab] OR Eritrea[tiab] OR Ethiopia[tiab] OR Kenya[tiab] OR Rwanda[tiab] OR Somalia[tiab] OR Sudan[tiab] OR Tanzania[tiab] OR Uganda[tiab] OR Angola[tiab] OR Botswana[tiab] OR Lesotho[tiab] OR Malawi[tiab] OR |

|    |                                                                                                                                                                                                                                                                                                                                                                                                                                                    |
|----|----------------------------------------------------------------------------------------------------------------------------------------------------------------------------------------------------------------------------------------------------------------------------------------------------------------------------------------------------------------------------------------------------------------------------------------------------|
|    | Mozambique[tiab] OR Namibia[tiab] OR South Africa[tiab] OR Swaziland[tiab] OR Zambia[tiab] OR Zimbabwe[tiab] OR Benin[tiab] OR Burkina Faso[tiab] OR Cape Verde[tiab] OR Cote d'Ivoire[tiab] OR Gambia[tiab] OR Ghana[tiab] OR Guinea[tiab] OR Guinea-Bissau[tiab] OR Liberia[tiab] OR Mali[tiab] OR Mauritania[tiab] OR Niger[tiab] OR Nigeria[tiab] OR Senegal[tiab] OR Sierra Leone[tiab] OR Togo[tiab] OR (subsaharan[ tiab] AND Africa[tiab]) |
| 19 | 5 and 16 and 17 and 18                                                                                                                                                                                                                                                                                                                                                                                                                             |
